# Supplementary material for: Major enteropathogens in humans, domestic animals, and environmental soil samples from the same locality: prevalence and transmission considerations in coastal Odisha, India
Source: PubMed Central journal article supplement (PMC7644938; doi:10.4178/epih.e2020034), 2020-05-26

**Supplementary Material 1: Detailed description of pathogen specific polymerase chain reaction primers for their specific detection**

| Pathogen                    | Target gene           | Primer Name           | Primer Sequence<br>(5' to 3')      | Tm<br>(°C) | Size<br>(bp) |
|-----------------------------|-----------------------|-----------------------|------------------------------------|------------|--------------|
| <i>Escherichia coli</i>     |                       |                       |                                    |            |              |
| EPEC                        | eae                   | EPEC_eaeA_F           | GACCCGGCACAAAGCATAAGC              | 59         | 384          |
|                             |                       | EPEC_eaeA_R           | CCACCTGCAGCAACAAGAGG               |            |              |
| EHEC                        | hlyA                  | EHEC_hlyA_F           | GCATCATCAAGCGTACGTCC               | 57         | 534          |
|                             |                       | EHEC_hlyA_R           | AATGAGCCAAGCTGGTTAAGCT             | 54         | 180          |
| EAEC                        | pCVD432<br>plasmid    | EAEC_pCVD432_F        | CTGGCGAAAGACTGTATCAT               | 51         | 630          |
|                             |                       | EAEC_pCVD432_R        | AAATGTATAGAAATCCGCTGTT             |            |              |
| STEC                        | stx1                  | <i>E.coli</i> _stx1_F | ATAAATCGCCATTTCGTTGACTAC           |            |              |
|                             |                       | <i>E.coli</i> _stx1_R | GGCACTGTCTGAAACTGCTCC              |            |              |
| STEC                        | stx2                  | <i>E.coli</i> _stx2_F | GGCACTGTCTGAAACTGCTCC              | 56         | 255          |
|                             |                       | <i>E.coli</i> _stx2_R | TCGCCAGTTATCTGACATTCTG             |            |              |
| STEC                        | H7 FLIC               | H7_FLIC-F             | GCGCTGTCGAGTTCTATCGAGC             | 59         | 625          |
|                             |                       | H7_FLIC-R             | CAACGGTGACTTATCGCCATTCC            |            |              |
| <i>Shigella Spp.</i>        |                       |                       |                                    |            |              |
|                             | ShET 1                | <i>Shigella</i> _1A_F | CAG CGT CTT TCA GCG ACA GTG<br>TTT | 59         | 530          |
|                             |                       | <i>Shigella</i> _1A_R | AGC ATG ATA CTC AAC AGC CAG<br>ACC |            |              |
|                             | ShET 2                | <i>Shigella</i> _1B_F | ATA CTG GCT CCT GTC ATT CAC<br>GGT |            |              |
|                             |                       | <i>Shigella</i> _1B_R | GGA AGT GAC AGG GCA TTT GTG<br>GAT |            |              |
| <i>Cryptosporidium Spp.</i> |                       |                       |                                    |            |              |
|                             | 18s SSU<br>rRNA locus | 18s Morgan F          | AGTGACAAGAAATAACAATACAGG           | 60         | 298          |
|                             |                       | 18s Morgan R          | CCTGCTTTAAGCACTCTAATTTTC           |            |              |
| <i>Giardia Spp.</i>         |                       |                       |                                    |            |              |
|                             | gdh gene              | GDHeF                 | TCAAGCTYAAYGCGYGGYTTGCGT           | 57         | 432          |
|                             |                       | GDHiF                 | CAGTACAACCTCYGCTCTCGG              |            |              |
|                             |                       | GDHiR                 | GTTRTCCTTGACATCTCC                 |            |              |

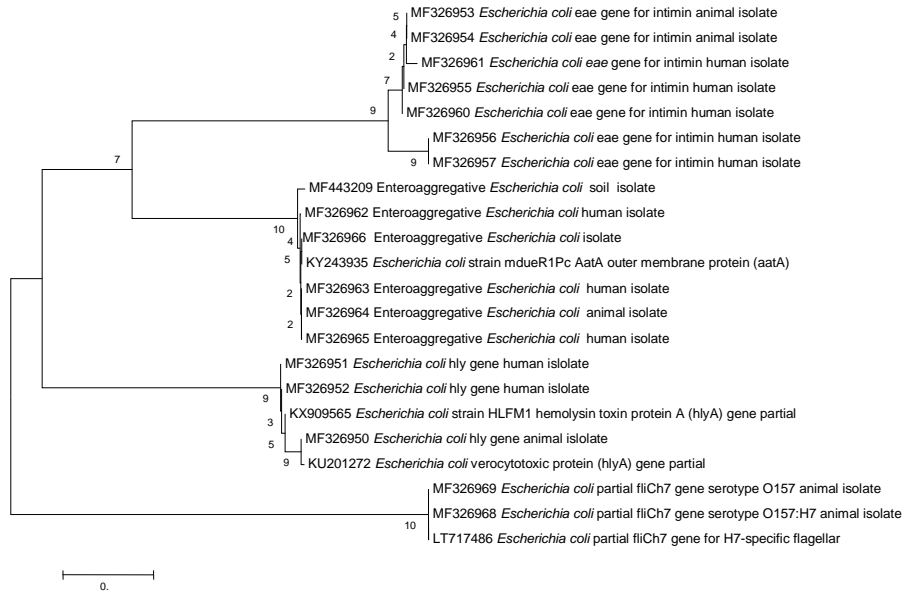

Supplement: epih-42-e2020034-suppl1.pdf [file epih-42-e2020034-suppl1.pdf]
