# Supplementary material for: Major enteropathogens in humans, domestic animals, and environmental soil samples from the same locality: prevalence and transmission considerations in coastal Odisha, India
Source: PubMed Central journal article supplement (PMC7644938; doi:10.4178/epih.e2020034), 2020-05-26

**Supplementary Material 2: Neighbor-joining tree for Genetic relatedness of pathogenic *E. coli* strains identified in this study;**The scale indicates the number of nucleotide substitutions per position. Numbers above the branches indicate bootstrap percentages (those above 50%) based on 1,000 replicates. Reference strains of pathogenic *E. coli* were selected from GenBank, using the accession numbers indicated in the text

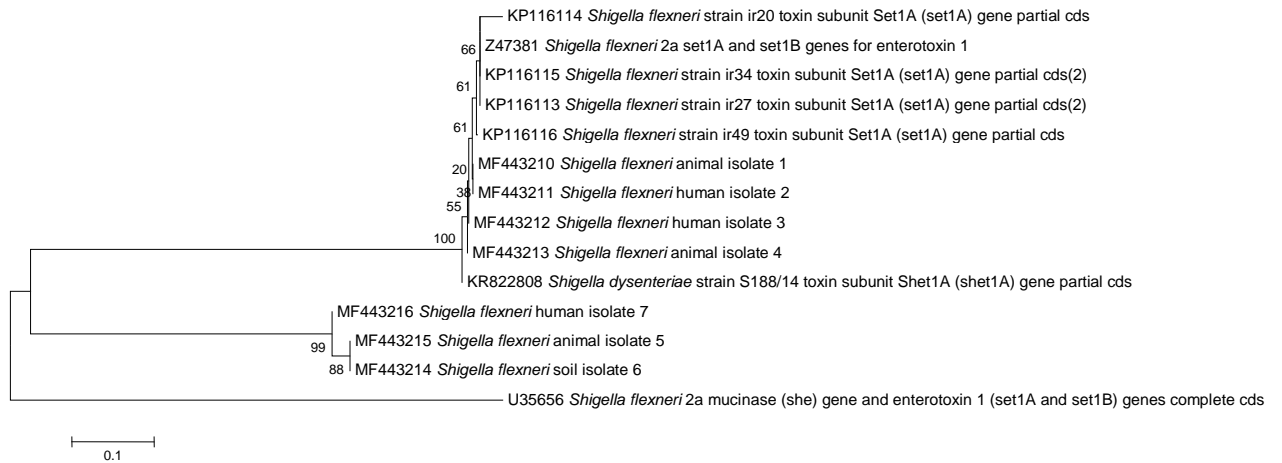

Supplement: epih-42-e2020034-suppl2.pdf [file epih-42-e2020034-suppl2.pdf]
